# Supplementary material
Source: PubMed Central journal article supplement (PMC3786426)
Supplement: NIHMS517147-supplement-01.pdf [file NIHMS517147-supplement-01.pdf]

**SUPPLEMENTARY FIGURE /TABLE LEGENDS**

**Figure S1.** EZ spheres remained karyotypically normal. Representative G-banding images are shown for 4.2 iPSC, 21.8 iPSC, and H9 hESC derived EZ spheres all at passage 17.

**Figure S2.** Rosette structures are detected following neural induction. (A) Rosettes were observed in whole, fixed 4.2 iPSC EZ spheres (passage 9) by ZO1 immunofluorescence and (B) in live, unfixed H9 hESC EZ spheres (passage 18) by light microscopy after 1 week of neural differentiation. Arrows in B point to the lumen at the apical side of the radially organized neuroepithelial cells.

**Figure S3.** Schematic of the differentiation protocols used. Beginning with EZ sphere formation, the multiple steps are diagramed to show the progression through several weeks of differentiation to generate motor neurons, dopamine neurons, striatal neurons, sensory neurons, and oligodendrocytes.

**Figure S4.** 21.8 iPSC EZ sphere-derived astrocytes show typical membrane current patterns. Potassium membrane currents and the current/voltage relationship were measured in response to 10mV steps from a resting potential of -70mV for (A) A1 type astrocytes, (B) A2 type astrocytes, and (C) complex type astrocytes. Astrocyte classifications was based on previous descriptions (Anderova et al., 2004).

**Figure S5.** Dual SMAD did not alter nestin expression levels in p3 H9 EZ spheres as demonstrated by (A) immunocytochemistry or (B) PCR.

**Figure S6.** Forebrain markers FOXP1 and OTX2 are up-regulated in 21.8 iPSC derived EZ spheres upon differentiation toward striatal neurons. Neither FOXP1 nor OTX2 were expressed in 21.8 iPSC derived EZ spheres at passage 15 prior to striatal differentiation. However, as early as 7 days into the differentiation protocol, both forebrain specific markers were up-regulated; this expression continued out to day 42 of differentiation.

**Table S1.** Nineteen independent stem cell lines have been used to generate EZ spheres. The reprogramming method and genes used for the generation of each line is listed. *OCT4* (O), *SOX2* (S), *Nanog* (N), *LIN28* (L), *KLF4* (K), and *c-myc* (M). Fibroblast lines are not applicable

(N/A) for the hESCs, and some iPSC lines used fibroblast cells that are not commercially available (NCA).

**Table S2.** Relative gene expression levels are depicted for all genes tested through passage 32. GAPDH was used as a control.

**Table S3.** This table lists the primer sequences and PCR conditions used for all genes tested.

**Table S4.** The table contains a list of the species and company for all antibodies used.

# Supplementary Figure 1

iPSC 4.2 EZ p17

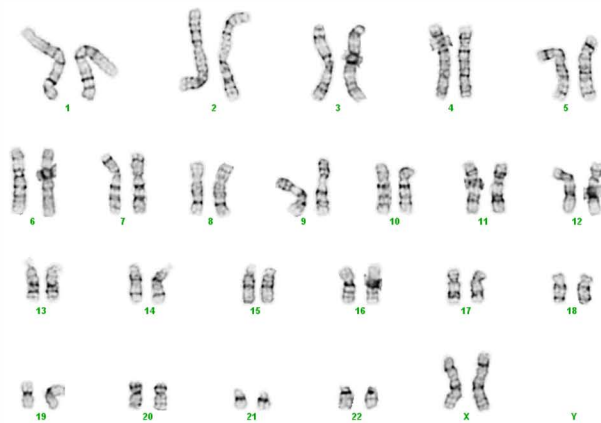

iPSC 21.8 EZ p17

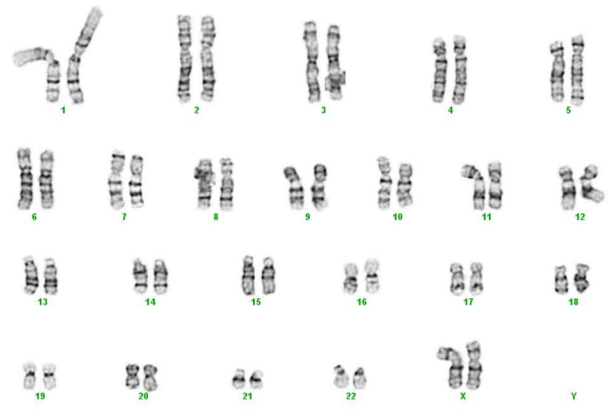

hESC H9 EZ p17

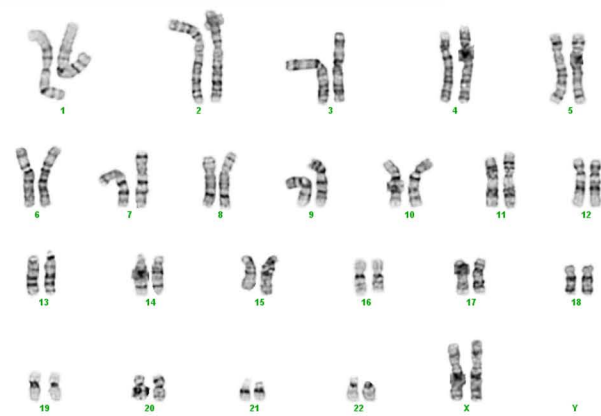

## Supplementary Figure 2

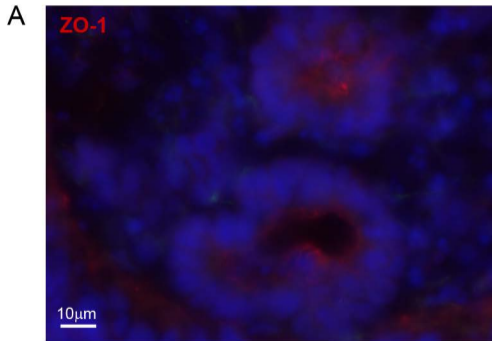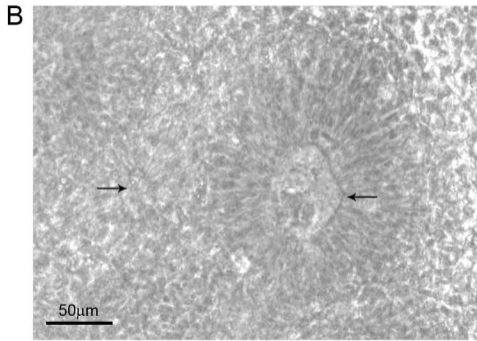

Supplementary Figure 3

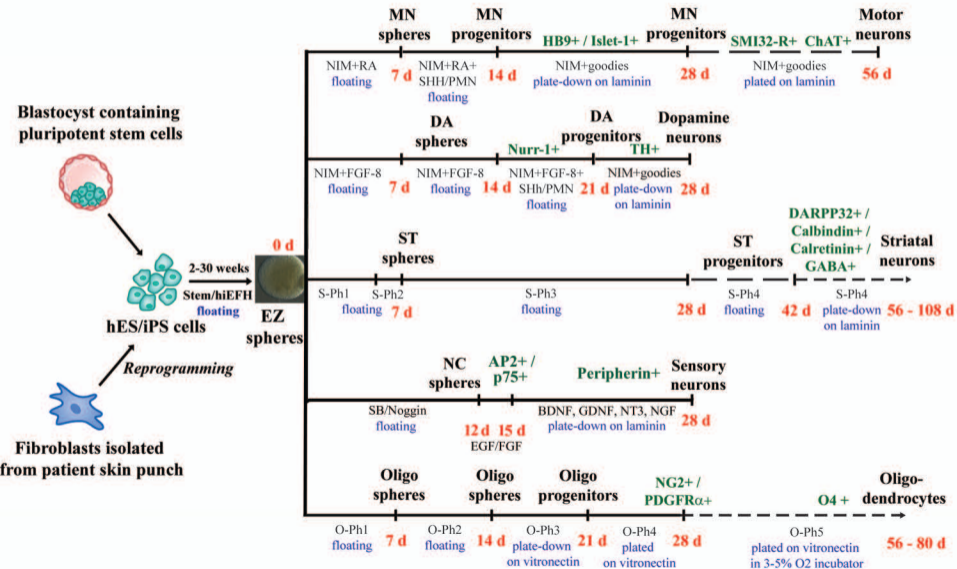

# Supplementary Figure 4

A

A1 astrocytes

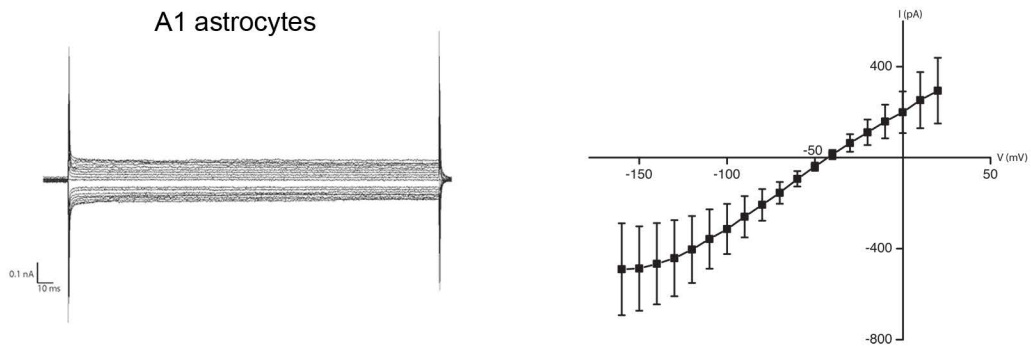

B

A2 astrocytes

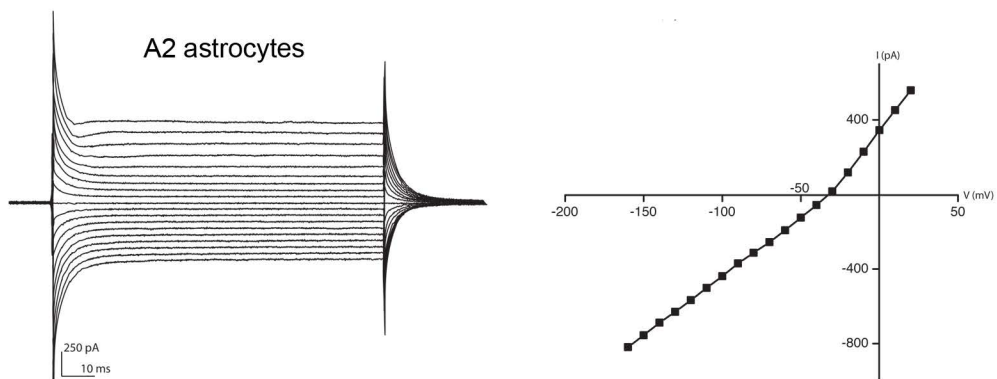

C

Complex astrocytes

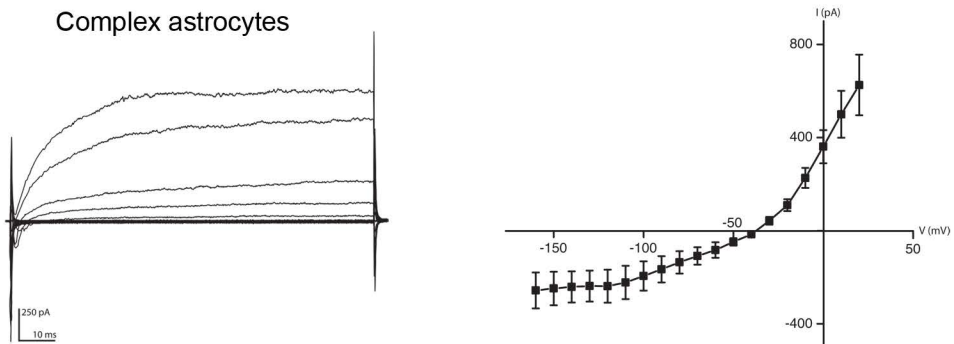

# Supplementary Figure 5

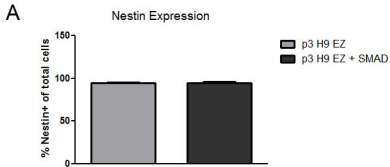

**B**

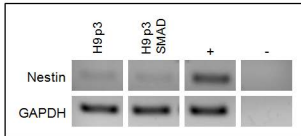

Supplementary Figure 6

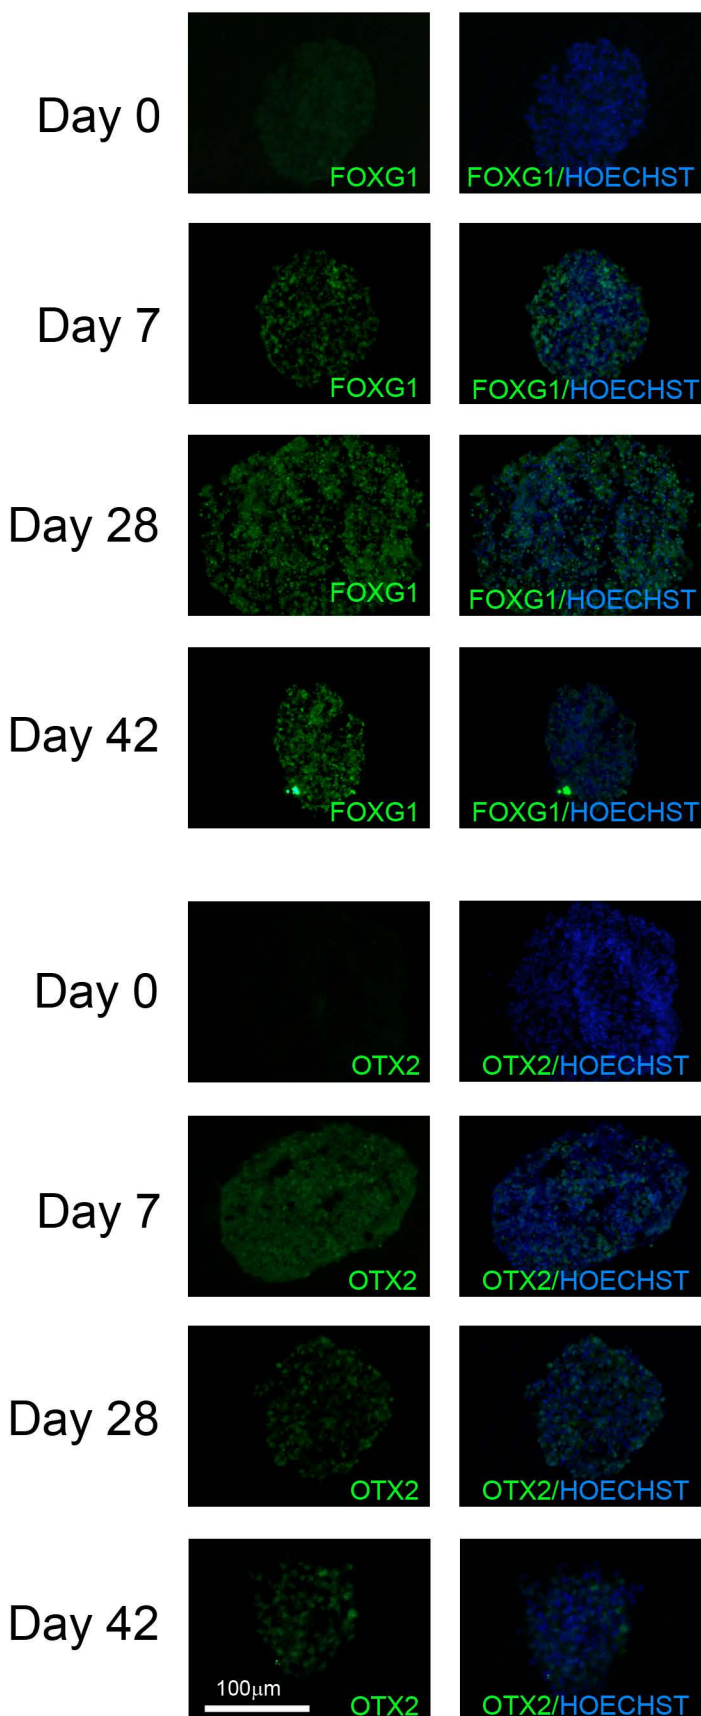



# Supplementary Table 1

| Name                 | Fibroblast line  | Reprogramming method           | Healthy/Affected | Reference                                                                                                                                                                                 | Other           |
|----------------------|------------------|--------------------------------|------------------|-------------------------------------------------------------------------------------------------------------------------------------------------------------------------------------------|-----------------|
| H9 (WA09) hESCs      | N/A              | N/A                            | Healthy          | Thomson et al., 1998                                                                                                                                                                      |                 |
| H1 (WA01) hESCs      | N/A              | N/A                            | Healthy          | Thomson et al., 1998                                                                                                                                                                      |                 |
| 4.2 iPSCs            | Coriell GM03814  | Lentivirus O,S,N,L             | Healthy          | Ebert et al., 2009                                                                                                                                                                        |                 |
| HD33i.8 (21.8) iPSCs | Coriell GM02183  | Lentivirus O,S,N,L,K,M         | Healthy          | HD iPSC Consortium, 2012                                                                                                                                                                  | multiple clones |
| FS1 iPSCs            | ATCC CRL-2097    | Lentivirus O,S,N,L             | Healthy          | Yu et al., 2007                                                                                                                                                                           | multiple clones |
| DF-6-9               | ATCC CRL-2097    | oriP/EBNA episomal O,S,N,L,K,M | Healthy          | Yu et al., 2009                                                                                                                                                                           | multiple clones |
| DF-4-3               | ATCC CRL-2097    | oriP/EBNA episomal O,S,N,L,K,M | Healthy          | Yu et al., 2009                                                                                                                                                                           |                 |
| DF-19-9              | ATCC CRL-2097    | oriP/EBNA episomal O,S,N,L,K,M | Healthy          | Yu et al., 2009                                                                                                                                                                           | multiple clones |
| IPRN0019.6           | NCA              | Retrovirus O,S,K,M             | Healthy          | iPierian                                                                                                                                                                                  |                 |
| IPRN0008.2           | NCA              | Retrovirus O,S,K,M             | SMA              | iPierian                                                                                                                                                                                  |                 |
| IPRN0008.2S          | NCA              | Retrovirus O,S,K,M             | SMA              | iPierian                                                                                                                                                                                  |                 |
| 3.6 iPSCs            | Coriell GM03813  | Lentivirus O,S,N,L             | SMA              | Ebert et al., 2009                                                                                                                                                                        | multiple clones |
| 7.12 iPSCs           | Coriell GM009677 | oriP/EBNA episomal O,S,N,L,K,M | SMA              | Sareen et al., 2012                                                                                                                                                                       | multiple clones |
| HD180i iPSCs         | Coriell GM09197  | Lentivirus O,S,N,L,M,K         | HD               | HD iPSC Consortium, 2012                                                                                                                                                                  | multiple clones |
| HD60i iPSCs          | Coriell GM03621  | Lentivirus O,S,N,L,M,K         | HD               | HD iPSC Consortium, 2012                                                                                                                                                                  | multiple clones |
| HD109i.1             | NCA              | Lentivirus O,S,K,M             | HD               | HD iPSC Consortium, 2012                                                                                                                                                                  |                 |
| Coriell ND35658      | NCA              | Retrovirus O,S,K,M             | ALS              | <a href="http://ccr.coriell.org/Sections/Collections/NINDS/ipsc_list.aspx?PgId=711&amp;coll=ND">http://ccr.coriell.org/Sections/Collections/NINDS/ipsc_list.aspx?PgId=711&amp;coll=ND</a> |                 |
| Coriell ND34391      | NCA              | Retrovirus O,S,K,M             | PD               | <a href="http://ccr.coriell.org/Sections/Search/Sample_Detail.aspx?Ref=ND34391&amp;PgId=166">http://ccr.coriell.org/Sections/Search/Sample_Detail.aspx?Ref=ND34391&amp;PgId=166</a>       |                 |
| 57.4 iPSC            | Coriell ND32157  | Sendai O,S,K,M                 | PD               | unpublished                                                                                                                                                                               | multiple clones |

N/A = not applicable

NCA = not commercially available

# Supplementary Table 2

**OCT4**

|      | colony | 0 | 1 | 2 | 3 | 4 | 5  | 6 | 7 | 8 | 9 | 10 | 11 | 12 | 13 | 14 | 15 | 16 | 17 | 18 | 19 | 20 | 21 | 22 | 23 | 24 | 25 | 26 | 27 | 28 | 29 | 30 | 31 | 32 |
|------|--------|---|---|---|---|---|----|---|---|---|---|----|----|----|----|----|----|----|----|----|----|----|----|----|----|----|----|----|----|----|----|----|----|----|
| H9   | +      | + | + | - | - | - | +  | + | + | + | + | +  | +  | +  | +  | +  | +  | +  | +  | +  | +  | +  | +  | -  | -  | -  | -  | -  | -  | -  | -  | NA | -  | -  |
| 4.2  | +      | + | + | - | - | - | ++ | + | + | - | - | -  | -  | -  | -  | -  | -  | -  | -  | -  | -  | -  | -  | -  | -  | -  | -  | -  | -  | -  | -  | -  | -  | NA |
| 21.8 | +      | + | + | - | - | - | +  | + | + | + | + | +  | +  | +  | +  | +  | +  | +  | +  | +  | +  | +  | +  | -  | -  | -  | -  | -  | -  | -  | -  | NA | -  | -  |

**SOX2**

|      | colony | 0 | 1 | 2 | 3 | 4 | 5 | 6 | 7 | 8 | 9 | 10 | 11 | 12 | 13 | 14 | 15 | 16 | 17 | 18 | 19 | 20 | 21 | 22 | 23 | 24 | 25 | 26 | 27 | 28 | 29 | 30 | 31 | 32 |   |
|------|--------|---|---|---|---|---|---|---|---|---|---|----|----|----|----|----|----|----|----|----|----|----|----|----|----|----|----|----|----|----|----|----|----|----|---|
| H9   | +      | + | + | + | + | + | + | + | + | + | + | +  | +  | +  | +  | +  | +  | +  | +  | +  | +  | +  | +  | +  | +  | +  | +  | +  | +  | +  | +  | +  | +  | +  | + |
| 4.2  | +      | + | + | + | + | + | + | + | + | + | + | +  | +  | +  | +  | +  | +  | +  | +  | +  | +  | +  | +  | +  | +  | +  | +  | +  | +  | +  | +  | +  | +  | +  | + |
| 21.8 | +      | + | + | + | + | + | + | + | + | + | + | +  | +  | +  | +  | +  | +  | +  | +  | +  | +  | +  | +  | +  | +  | +  | +  | +  | +  | +  | +  | +  | +  | +  | + |

**Nestin**

|      | colony | 0 | 1 | 2 | 3 | 4 | 5 | 6 | 7 | 8 | 9 | 10 | 11 | 12 | 13 | 14 | 15 | 16 | 17 | 18 | 19 | 20 | 21 | 22 | 23 | 24 | 25 | 26 | 27 | 28 | 29 | 30 | 31 | 32 |   |
|------|--------|---|---|---|---|---|---|---|---|---|---|----|----|----|----|----|----|----|----|----|----|----|----|----|----|----|----|----|----|----|----|----|----|----|---|
| H9   | +      | + | + | + | + | + | + | + | + | + | + | +  | +  | +  | +  | +  | +  | +  | +  | +  | +  | +  | +  | +  | +  | +  | +  | +  | +  | +  | +  | +  | +  | +  | + |
| 4.2  | +      | + | + | + | + | + | + | + | + | + | + | +  | +  | +  | +  | +  | +  | +  | +  | +  | +  | +  | +  | +  | +  | +  | +  | +  | +  | +  | +  | +  | +  | +  | + |
| 21.8 | +      | + | + | + | + | + | + | + | + | + | + | +  | +  | +  | +  | +  | +  | +  | +  | +  | +  | +  | +  | +  | +  | +  | +  | +  | +  | +  | +  | +  | +  | +  | + |

**Pax6**

|      | colony | 0 | 1 | 2 | 3 | 4 | 5 | 6 | 7 | 8 | 9 | 10 | 11 | 12 | 13 | 14 | 15 | 16 | 17 | 18 | 19 | 20 | 21 | 22 | 23 | 24 | 25 | 26 | 27 | 28 | 29 | 30 | 31 | 32 |
|------|--------|---|---|---|---|---|---|---|---|---|---|----|----|----|----|----|----|----|----|----|----|----|----|----|----|----|----|----|----|----|----|----|----|----|
| H9   | -      | + | + | - | - | - | - | - | - | - | - | -  | -  | -  | -  | -  | -  | -  | -  | -  | -  | -  | -  | -  | -  | -  | -  | -  | -  | -  | -  | -  | -  | -  |
| 4.2  | -      | + | + | - | - | - | + | - | - | - | - | -  | -  | -  | -  | -  | -  | -  | -  | -  | -  | -  | -  | -  | -  | -  | -  | -  | -  | -  | -  | -  | -  | -  |
| 21.8 | -      | + | + | - | - | - | - | - | - | - | - | -  | -  | -  | -  | -  | -  | -  | -  | -  | -  | -  | -  | -  | -  | -  | -  | -  | -  | -  | -  | -  | -  | -  |

**Foxg1**

|      | colony | 0 | 1 | 2 | 3 | 4 | 5 | 6 | 7 | 8 | 9 | 10 | 11 | 12 | 13 | 14 | 15 | 16 | 17 | 18 | 19 | 20 | 21 | 22 | 23 | 24 | 25 | 26 | 27 | 28 | 29 | 30 | 31 | 32 |
|------|--------|---|---|---|---|---|---|---|---|---|---|----|----|----|----|----|----|----|----|----|----|----|----|----|----|----|----|----|----|----|----|----|----|----|
| H9   | -      | + | + | + | + | + | - | - | - | - | - | -  | -  | -  | -  | -  | -  | -  | -  | -  | -  | -  | -  | -  | -  | -  | -  | -  | -  | -  | -  | -  | -  | -  |
| 4.2  | -      | + | + | - | - | - | + | - | - | - | + | -  | -  | -  | -  | -  | -  | -  | -  | -  | -  | -  | -  | -  | -  | -  | -  | -  | -  | -  | -  | -  | -  | -  |
| 21.8 | -      | - | - | - | - | - | - | - | - | - | - | -  | -  | -  | -  | -  | -  | -  | -  | -  | -  | -  | -  | -  | -  | -  | -  | -  | -  | -  | -  | -  | -  | -  |

**HNK1**

|      | colony | 0 | 1 | 2 | 3 | 4 | 5 | 6 | 7 | 8 | 9 | 10 | 11 | 12 | 13 | 14 | 15 | 16 | 17 | 18 | 19 | 20 | 21 | 22 | 23 | 24 | 25 | 26 | 27 | 28 | 29 | 30 | 31 | 32 |   |
|------|--------|---|---|---|---|---|---|---|---|---|---|----|----|----|----|----|----|----|----|----|----|----|----|----|----|----|----|----|----|----|----|----|----|----|---|
| H9   | +      | + | - | + | + | + | + | + | + | + | - | +  | +  | +  | +  | +  | +  | +  | +  | +  | +  | +  | +  | +  | +  | +  | +  | +  | +  | +  | +  | +  | +  | +  |   |
| 4.2  | +      | + | - | - | + | + | + | + | + | + | + | +  | +  | +  | +  | +  | +  | +  | +  | +  | +  | +  | +  | +  | +  | +  | +  | +  | +  | +  | +  | +  | +  | +  |   |
| 21.8 | +      | + | + | + | + | + | - | - | + | + | + | +  | +  | +  | +  | +  | +  | +  | +  | +  | +  | +  | +  | +  | +  | +  | +  | +  | +  | +  | +  | +  | +  | +  | + |

**GBX2**

|      | colony | 0 | 1 | 2 | 3 | 4 | 5 | 6 | 7 | 8 | 9 | 10 | 11 | 12 | 13 | 14 | 15 | 16 | 17 | 18 | 19 | 20 | 21 | 22 | 23 | 24 | 25 | 26 | 27 | 28 | 29 | 30 | 31 | 32 |
|------|--------|---|---|---|---|---|---|---|---|---|---|----|----|----|----|----|----|----|----|----|----|----|----|----|----|----|----|----|----|----|----|----|----|----|
| H9   | -      | + | + | - | + | + | + | + | - | - | - | -  | -  | -  | -  | -  | -  | -  | -  | -  | -  | -  | -  | -  | -  | -  | -  | -  | -  | -  | -  | -  | -  | -  |
| 4.2  | -      | + | + | + | - | - | - | - | + | - | - | -  | -  | -  | -  | -  | -  | -  | -  | -  | -  | -  | -  | -  | -  | -  | -  | -  | -  | -  | -  | -  | -  | -  |
| 21.8 | -      | + | + | + | + | - | + | - | - | - | - | -  | -  | -  | -  | -  | -  | -  | -  | -  | -  | -  | -  | -  | -  | -  | -  | -  | -  | -  | -  | -  | -  | -  |

**OTX2**

|      | colony | 0 | 1 | 2 | 3 | 4 | 5 | 6 | 7 | 8 | 9 | 10 | 11 | 12 | 13 | 14 | 15 | 16 | 17 | 18 | 19 | 20 | 21 | 22 | 23 | 24 | 25 | 26 | 27 | 28 | 29 | 30 | 31 | 32 |   |
|------|--------|---|---|---|---|---|---|---|---|---|---|----|----|----|----|----|----|----|----|----|----|----|----|----|----|----|----|----|----|----|----|----|----|----|---|
| H9   | +      | + | + | - | - | - | - | - | + | + | + | +  | +  | +  | +  | +  | +  | +  | +  | +  | +  | +  | +  | +  | +  | +  | +  | +  | +  | +  | +  | +  | +  | +  |   |
| 4.2  | +      | + | + | + | + | + | + | + | + | + | + | +  | +  | +  | +  | +  | +  | +  | +  | +  | +  | +  | +  | +  | +  | +  | +  | +  | +  | +  | +  | +  | +  | +  | + |
| 21.8 | +      | + | + | - | - | - | - | - | - | - | - | -  | -  | -  | -  | -  | -  | -  | -  | -  | -  | -  | -  | -  | -  | -  | -  | -  | -  | -  | -  | -  | -  | -  |   |

**Pax7**

|      | colony | 0 | 1 | 2 | 3 | 4 | 5 | 6 | 7 | 8 | 9 | 10 | 11 | 12 | 13 | 14 | 15 | 16 | 17 | 18 | 19 | 20 | 21 | 22 | 23 | 24 | 25 | 26 | 27 | 28 | 29 | 30 | 31 | 32 |
|------|--------|---|---|---|---|---|---|---|---|---|---|----|----|----|----|----|----|----|----|----|----|----|----|----|----|----|----|----|----|----|----|----|----|----|
| H9   | +      | + | - | - | - | - | - | - | - | - | - | -  | -  | -  | -  | -  | -  | -  | -  | -  | -  | -  | -  | -  | -  | -  | -  | -  | -  | -  | -  | -  | -  | -  |
| 4.2  | +      | + | + | + | - | - | - | - | - | - | - | -  | -  | -  | -  | -  | -  | -  | -  | -  | -  | -  | -  | -  | -  | -  | -  | -  | -  | -  | -  | -  | -  | -  |
| 21.8 | +      | + | + | - | - | - | - | - | + | - | - | -  | -  | -  | -  | -  | -  | -  | -  | -  | -  | -  | -  | -  | -  | -  | -  | -  | -  | -  | -  | -  | -  | -  |

**GAPDH**

|      | colony | 0 | 1 | 2 | 3 | 4 | 5 | 6 | 7 | 8 | 9 | 10 | 11 | 12 | 13 | 14 | 15 | 16 | 17 | 18 | 19 | 20 | 21 | 22 | 23 | 24 | 25 | 26 | 27 | 28 | 29 | 30 | 31 | 32 |   |
|------|--------|---|---|---|---|---|---|---|---|---|---|----|----|----|----|----|----|----|----|----|----|----|----|----|----|----|----|----|----|----|----|----|----|----|---|
| H9   | +      | + | + | + | + | + | + | + | + | + | + | +  | +  | +  | +  | +  | +  | +  | +  | +  | +  | +  | +  | +  | +  | +  | +  | +  | +  | +  | +  | +  | +  | +  |   |
| 4.2  | +      | + | + | + | + | + | + | + | + | + | + | +  | +  | +  | +  | +  | +  | +  | +  | +  | +  | +  | +  | +  | +  | +  | +  | +  | +  | +  | +  | +  | +  | +  |   |
| 21.8 | +      | + | + | + | + | + | + | + | + | + | + | +  | +  | +  | +  | +  | +  | +  | +  | +  | +  | +  | +  | +  | +  | +  | +  | +  | +  | +  | +  | +  | +  | +  | + |

+++ = high    ++ = medium    + = low    - = not expressed    NA = Not available

### Supplementary Table 3

| Target  | Annealing Temperature (°C) | Amplicon Length (bp) | Cycles | Forward Primer Sequence (5' to 3') | Reverse Primer Sequence (5' to 3') |
|---------|----------------------------|----------------------|--------|------------------------------------|------------------------------------|
| β-actin | 60                         | 198                  | 30     | GCCCATCTACGAGGGGTATG               | GTGGCCATCTCTTGCTCGAAG              |
| DACH1   | 57                         | 208                  | 30     | GTGGAAAACACCCCTCAGAA               | CTTGTTCCACATTGCACACC               |
| FOXP1   | 57                         | 204                  | 30     | CCCTCCCATTCTGTACGTTT               | CTGGCGGCTCTTAGAGAT                 |
| GAPDH   | 60                         | 153                  | 30     | GTGGACCTGACCTGCCGTCT               | GGAGGAGTGGGTGTCGCTGT               |
| GBX2    | 62                         | 173                  | 35     | CTCGCTGCTCGCCTTCTC                 | GCCAGTCAGTCAGATTGTCATCCG           |
| HNK1    | 58                         | 162                  | 30     | TCGCCTGGACTGGACTGGGG               | TGGCCTGGCCTCCCTCCTC                |
| HOXB4   | 56                         | 187                  | 30     | ACACCCGCTAACAAATGAGG               | GCACGAAAGATGAGGGAGAG               |
| Nestin  | 61                         | 146                  | 30     | TCTCCAGAAACTCAAGCACCCTG            | TCCTGATTCTCCTCTTCCAGGAGT           |
| OCT4    | 60                         | 168                  | 30     | GTACTCCTCGGTCCCTTTCC               | CAAAAACCCTGGCACAAACT               |
| OTX2    | 61                         | 204                  | 30     | TCAACTTGCCCGAGTCGAGG               | CAATGGTCGGGACTGAGGTG               |
| PAX3    | 56                         | 269                  | 30     | AAAGAGGAACAGCGCAGAA                | GAGGTCTCCGACAGCTGGTA               |
| PAX6    | 60                         | 561                  | 30     | AACAGATGGGCGCAGACGGC               | GGGCTGTGTCTGTTCGGCCC               |
| PAX7    | 56                         | 253                  | 30     | GGGAAGAAAGAGGAGGAGGA               | CCTCGCGGGTGTATATGTCT               |
| SOX1    | 61                         | 210                  | 35     | CGCTCACTTCTCCTCCGCTT               | GAATATAACTCCGCCGCTG                |
| SOX2    | 55                         | 141                  | 30     | AGTCTCCAAGCGACGAAAAA               | GCAAGAAGCCTCTCCTTG                 |

|                        |                |        |
|------------------------|----------------|--------|
| Activation             | 94°C           | 10 min |
| PCR (x30 or 35 cycles) | 94°C           | 60 sec |
|                        | annealing temp | 60 sec |
|                        | 72°C           | 90 sec |
| Hold                   | 10°C           | ∞      |

Supplementary Table 4

| Antigen                     | Species    | Company                              |
|-----------------------------|------------|--------------------------------------|
| AP2                         | mouse      | Developmental Studies Hybridoma Bank |
| $\beta$ -catenin            | rabbit     | Cell Signaling                       |
| BLBP                        | rabbit     | Chemicon                             |
| Calbindin                   | rabbit     | Sigma                                |
| Calretinin                  | goat       | Abcam                                |
| ChAT                        | goat       | Millipore                            |
| DARPP32                     | rabbit     | Cell Signaling                       |
| FOXG1                       | rabbit     | Neuracell                            |
| GABA                        | rabbit     | Sigma                                |
| GFAP                        | rabbit     | Dako                                 |
| GLAST                       | Guinea pig | Chemicon                             |
| HB9 (MNR2)                  | mouse      | Developmental Studies Hybridoma Bank |
| Islet1                      | mouse      | Developmental Studies Hybridoma Bank |
| Ki67                        | mouse      | Chemicon                             |
| Map2a/b                     | mouse      | Millipore                            |
| Nanog                       | rabbit     | Abcam                                |
| N-Cadherin                  | mouse      | BD Biosciences                       |
| Nestin                      | rabbit     | Millipore                            |
| NF160                       | mouse      | Sigma                                |
| O4                          | mouse      | Sigma                                |
| Olig2                       | rabbit     | Chemicon                             |
| OTX2                        | rabbit     | Chemicon                             |
| P75                         | rabbit     | Promega                              |
| PAR3                        | rabbit     | Millipore                            |
| Pax6                        | rabbit     | Covance                              |
| Peripherin                  | rabbit     | Millipore                            |
| PLZF                        | mouse      | Calbiochem                           |
| SMI32R                      | mouse      | Covance                              |
| Sox1                        | goat       | Santa Cruz Biotechnology             |
| Sox2                        | rabbit     | Millipore                            |
| SSEA-3                      | mouse      | gift from ESTOOLS Consortium         |
| TH                          | mouse      | ImmunoStar                           |
| Tra-1-81                    | mouse      | gift from ESTOOLS Consortium         |
| Tuj1 ( $\beta$ III tubulin) | mouse      | Sigma                                |
| Vimentin                    | mouse      | Developmental Studies Hybridoma Bank |
| ZO-1                        | rabbit     | Invitrogen                           |
